# Supplementary material for: Acetone Sensing and Catalytic Conversion by Pd-Loaded SnO2
Source: MDPI journal article supplement (doi:10.3390/ma14205921), 2021-10-09
Supplement: s1 [file s1]

# Acetone Sensing and Catalytic Conversion by Pd-loaded SnO<sub>2</sub>

## Supporting Information

*Pascal M. Gschwend<sup>1</sup>, Florian M. Schenk<sup>1</sup>, Alexander Gogos<sup>2,3</sup>, Sotiris E. Pratsinis<sup>1\*</sup>*

<sup>1</sup> Particle Technology Laboratory, Institute of Energy and Process Engineering, Department of Mechanical and Process Engineering, ETH Zurich, Sonneggstrasse 3, CH-8092 Zurich, Switzerland

<sup>2</sup> Particles-Biology Interactions, Department of Materials Meet Life, Swiss Federal Laboratories for Materials Science and Technology (Empa), Lerchenfeldstrasse 5, CH-9014 St. Gallen, Switzerland

<sup>3</sup> Nanoparticle Systems Engineering Laboratory, Institute of Energy and Process Engineering, Department of Mechanical and Process Engineering, ETH Zurich, Sonneggstrasse 3, CH-8092 Zurich, Switzerland

\* Corresponding author: pratsinis@ethz.ch

## Experimental

### Synthesis of Sensing Particles

Pure SnO<sub>2</sub> nanoparticles were prepared by flame spray pyrolysis as before [18]. In short, tin(II)-ethylhexanoate (STREM Chemicals, purity >99%) was diluted with xylene (Aldrich, purity >96%) to a final metal concentration of 0.5 M. The precursor solution was fed at 5 ml/min through a capillary tube and dispersed with oxygen (5 L/min) from the adjacent annulus into a spray of fine droplets, that is ignited and supported by a surrounding ring-shaped, premixed flamelet (CH<sub>4</sub>/O<sub>2</sub> = 1.25/3.25 L/min). The spray flame was sheathed by 5 L/min of O<sub>2</sub> fed through the adjacent annulus to ensure complete precursor combustion. The powder was collected on a glass-fiber filter (Albet-Hahnemuehle, GF6, 257 mm diameter) with the aid of a vacuum pump (Busch, Seco SV 1025 C). The as-prepared powders were removed from the above filter with a spatula, sieved (0.25 mm stainless steel sieve) to remove glass-fiber residues and then annealed in air for five hours at 500 °C (Carbolite CWF 1300).

Palladium was then photo-deposited [19] onto pure flame-made and annealed SnO<sub>2</sub> at a concentration of 0, 0.1, 0.2, 0.5, 1 and 3 mol %. To this end, one gram of pure, annealed SnO<sub>2</sub> was dispersed in 100 ml of a water-ethanol mixture (4:6 volume ratio) in a glass beaker (diameter = 7 cm, height = 10 cm) using an ultrasonic bath for 10 min. In another beaker, an appropriate amount of Pd-nitrate solution (Pd(NO<sub>3</sub>)<sub>2</sub>, 10 wt% Pd, Alfa Aesar) was mixed with distilled water to a total volume of 100 ml, which was then added to the SnO<sub>2</sub> dispersion. After 2 min of magnetic stirring at 500 rpm, the beaker was illuminated for 4 h by a UV-lamp (302 nm, 8 W) placed on top of the beaker. Afterwards, the entire suspension was washed three times by centrifugation (10 min, 7500 RCF, Eppendorf centrifuge), the supernatants discarded and the pellet redispersed with distilled water under intermediate ultrasonication. Subsequently, the washed powder was dried in a vacuum oven (SalvisLab, vacucenter) for 12 h at 50 °C and 50 mbar, followed by grinding the collected powder in an agate mortar. Afterwards, the Pd-loaded (0 – 3 mol%) SnO<sub>2</sub> powders were annealed again at 500 °C for 5 h to bond the Pd to the SnO<sub>2</sub> support [20].

### Powder characterization

The particle composition was investigated by X-ray diffraction (XRD, Bruker D2 Phaser) at 30 kV and 10 mA at 2θ (Cu K<sub>α</sub>) of 15 – 70°, with a scanning speed of 0.3 s/step and a step size of 0.0203°. The patterns and crystal sizes were evaluated with the software TOPAS 4 (Bruker) and Rietveld fundamental parameter refinement with the reference files of cassiterite SnO<sub>2</sub> (PDF 41-1445), Pd (PDF 01-1310) and PdO (PDF 43-1024). The specific surface area (SSA) of powders was determined by five-point N<sub>2</sub> adsorption using the Brunauer-Emmett-Teller (BET) method at 77 K (Micromeritics,

TriStar 2 Plus). Prior to these measurements, powders were degassed under nitrogen for at least an hour at 150 °C. Particle sizes ( $d_{\text{BET}}$ ) were calculated using the densities of  $\text{SnO}_2$  (6.95 g/cm<sup>3</sup>) and  $\text{PdO}$  (8.3 g/cm<sup>3</sup>). The noble metal dispersion was determined on an Autochem II (Micromeritics) by CO-pulse chemisorption at 40 °C using a He flow of 50 ml/min and 5 % CO in He as loop gas at 50 ml/min. Prior to such measurements, samples were reduced using 5 %  $\text{H}_2$  in Ar (50 ml/min) at 150 °C (heated at 10 °C/min with 30 min holding time at 150 °C). An adsorption stoichiometry (Fagherazzi, et al., 2000) of  $\text{Pd}:\text{CO} = 2$  was assumed to calculate the metal dispersion and resulting Pd size (hemispherical particle shape).

For electron microscopy analysis, spatula tips of the dry material were mixed with 250  $\mu\text{l}$  ethanol (>99.9% purity, LiChrosolv®, Merck) in a 1.5 ml eppendorf tube. The sample was then sonicated for 2 min and left to stand/sediment for 2 more min. Subsequently, 10  $\mu\text{l}$  of the supernatant were drawn through a copper lacey carbon grid (EM resolutions, UK) using a tissue and the grid was washed three times with ultrapure water. Specimens were then imaged by TEM (transmission electron microscopy, Talos F200X, Super-X EDS, 4 detector configuration, FEI, USA) at an accelerating voltage of 200 kV. For acquisition of HAADF-STEM (high-angle annular dark-field scanning transmission electron microscopy) combined with EDX (energy-dispersive x-ray) element maps, a beam current of  $\approx 8$  nA was used. The data were processed using the software Velox 3.0.0.815 (Thermo fisher/FEI, USA). Size distribution of Pd-clusters have been extracted using the NanoDefine Particle Sizer plug-in for ImageJ.

For chemical analysis, the Pd-loaded particles were treated in a quartz reactor at 150°C for 30 min with a reducing atmosphere (5 %  $\text{H}_2$  in Ar, 100 ml/min) at 150 °C) to reduce all  $\text{PdO}_x$  species to leachable Pd. Then, 80 mg of the reduced powder were added to 80 ml of 10% nitric acid (Fisher Scientific, 65%  $\text{HNO}_3$  in water, purity 99.99%) in distilled water in a round-bottom flask (100 ml), heated in an oil-bath at 60 °C under magnetic stirring for 4h. The undissolved  $\text{SnO}_2$  particles were separated by centrifugation (10 min, 7197 RCF, Eppendorf centrifuge 5430) from the leachate containing dissolved Pd. The solution was analyzed by ICP-OES (inductively coupled plasma optical emission spectrometry, Varian 720-ES axial) to determine the Pd loading. A Pd standard solution (Supelco Palladium standard,  $\text{Pd}(\text{NO}_3)_2$  in  $\text{HNO}_3$ , 1000 mg/l, Pd certipur, MilliporeSigma) was used for calibration.

### Sensor Fabrication

The Pd-containing  $\text{SnO}_2$  particles were mixed with 1,2-propanediol (Aldrich, purity >99.5%) to form viscous and homogeneous pastes. Sensing films were prepared by doctor-blading [18] the pastes with a razor blade onto  $\text{Al}_2\text{O}_3$  sensor substrates (15x13x0.8 mm, Electronic Design Centre Case

Western Reserve University, Electrode type #103). The substrates contained interdigitated Pt electrode pairs (sputtered, 350  $\mu\text{m}$  width and spacing) and a Pt resistance temperature detector (RTD) on the front while featuring a Pt heater on the back. During doctor-blading, a 15  $\mu\text{m}$  thick aluminum foil was used to cover the RTD and edges of the substrate. The sensors were dried in ambient air for 4 h and placed in an oven (Carbolite, CWF 1300) at 80  $^{\circ}\text{C}$  for further evaporation of the solvent. No further annealing was done before sensing testing following Korotcenkov et al. [21].

### Sensor measurements

The sensors were tested as described previously [18]. In brief, 1 L/min of synthetic air was partially bubbled through distilled water to attain 50 % relative humidity (RH). Acetone was admixed from calibrated gas standards to achieve a 1 ppm concentration. The sensors were first heated to 350  $^{\circ}\text{C}$  by supplying a DC voltage through their heater. Subsequently, the sensor measurements were performed with decreasing temperature steps down to 150  $^{\circ}\text{C}$ . The sensor response ( $S$ ) was defined

as  $S = \frac{R_{\text{air}}}{R_{\text{analyte}}} - 1$  wherein  $R_{\text{air}}$  and  $R_{\text{analyte}}$  are the sensing film resistance in synthetic air (including

RH) without and with analyte, respectively. The sensor response and recovery times were defined as the times needed to reach or recover 90 % of the resistance change during or after analyte exposure, respectively. The limit of detection was calculated at a signal-to-noise ratio of 3, where the noise was defined as one standard deviation of the film baseline resistance. The corresponding concentration was found by linearly extrapolating the sensor response at low concentrations through the origin.

### Catalytic measurements

Catalytic measurements were done as described previously [22] with a small modification: The catalytic packed beds consisted of only 20 mg particles in a quartz glass tube with 4 mm inner diameter, that were fixed with quartz wool at both ends. The reactor was placed inside a furnace and 0.15 L/min of the same gas mixtures as for the sensing flowed through the tube. The off-gas was analyzed in real-time by a PTR-ToF-MS (Proton transfer reaction time of flight mass spectrometry, IONICON, PTR-ToF-MS 1000, Austria) to its outlet. Acetone concentrations were investigated at mass-to charge ( $m/z$ ) ratio (Müller, et al., 2014) of 59.045 and the gas conversion was calculated by

$$c = 1 - \frac{\text{outlet concentration}}{\text{inlet concentration}}.$$

## Supporting Figures

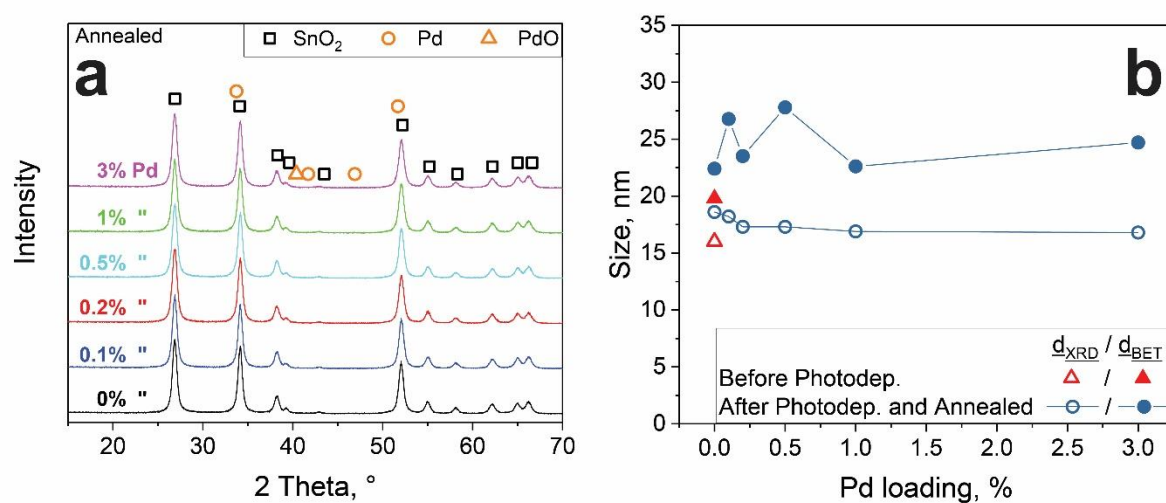

**Figure S1: a)** XRD patterns of SnO<sub>2</sub> with 0 – 3 mol% photodeposited palladium. No differences can be observed between them. **b)** Crystal ( $d_{\text{XRD}}$ , open symbols) and primary particle sizes ( $d_{\text{BET}}$ , filled symbols) before (triangles) and after photodeposition of Pd and annealing (circles).

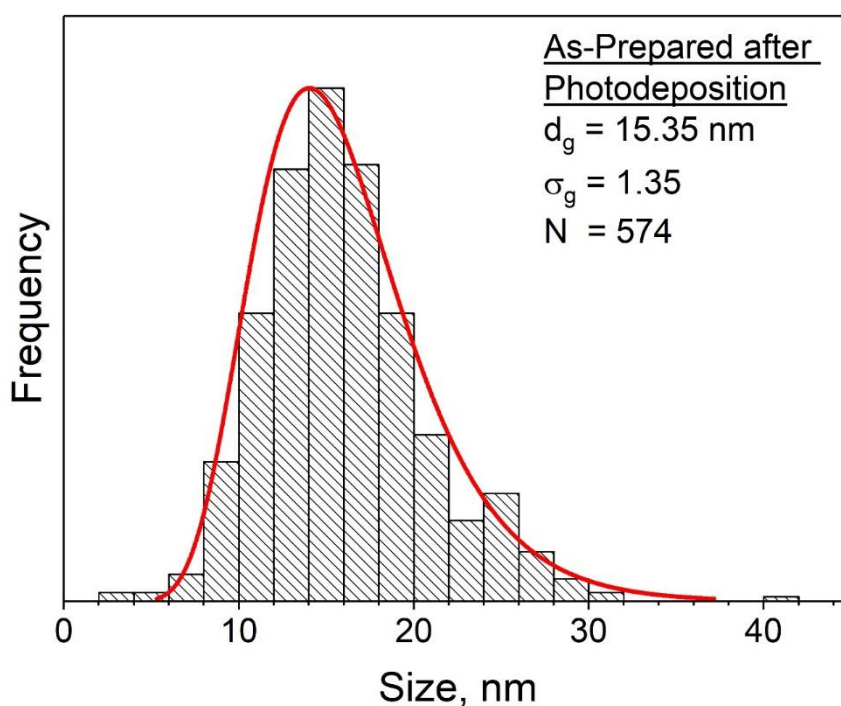

**Figure S2:** Primary particle size distribution from electron microscopy of SnO<sub>2</sub> particles (before the second annealing step) along with a fitted log-normal distribution (red line). The inset gives the geometric mean diameter ( $d_g$ ) and standard deviation ( $\sigma_g$ ) based on 574 counted particles ( $N$ ), yielding almost identical results to the values after the second annealing step (Figure 1d). Therefore, the second annealing step had no effect on the SnO<sub>2</sub> size observed by microscopy.

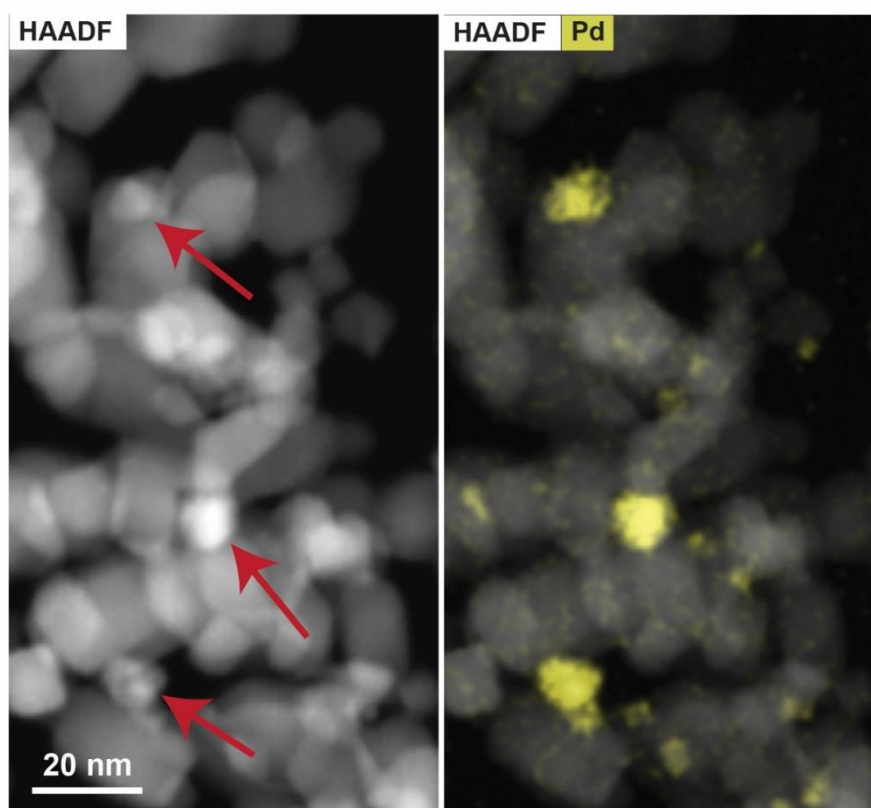

**Figure S3: a)** HAADF-STEM image of 3 mol% Pd-SnO<sub>2</sub> particles and **b)** an overlay with a Pd mapping (yellow). Due to the similarity in atomic number (thus Z-contrast), Pd particles cannot clearly be distinguished from SnO<sub>2</sub> (Examples highlighted with red arrows). Only the elemental mapping reveals the Pd clusters.

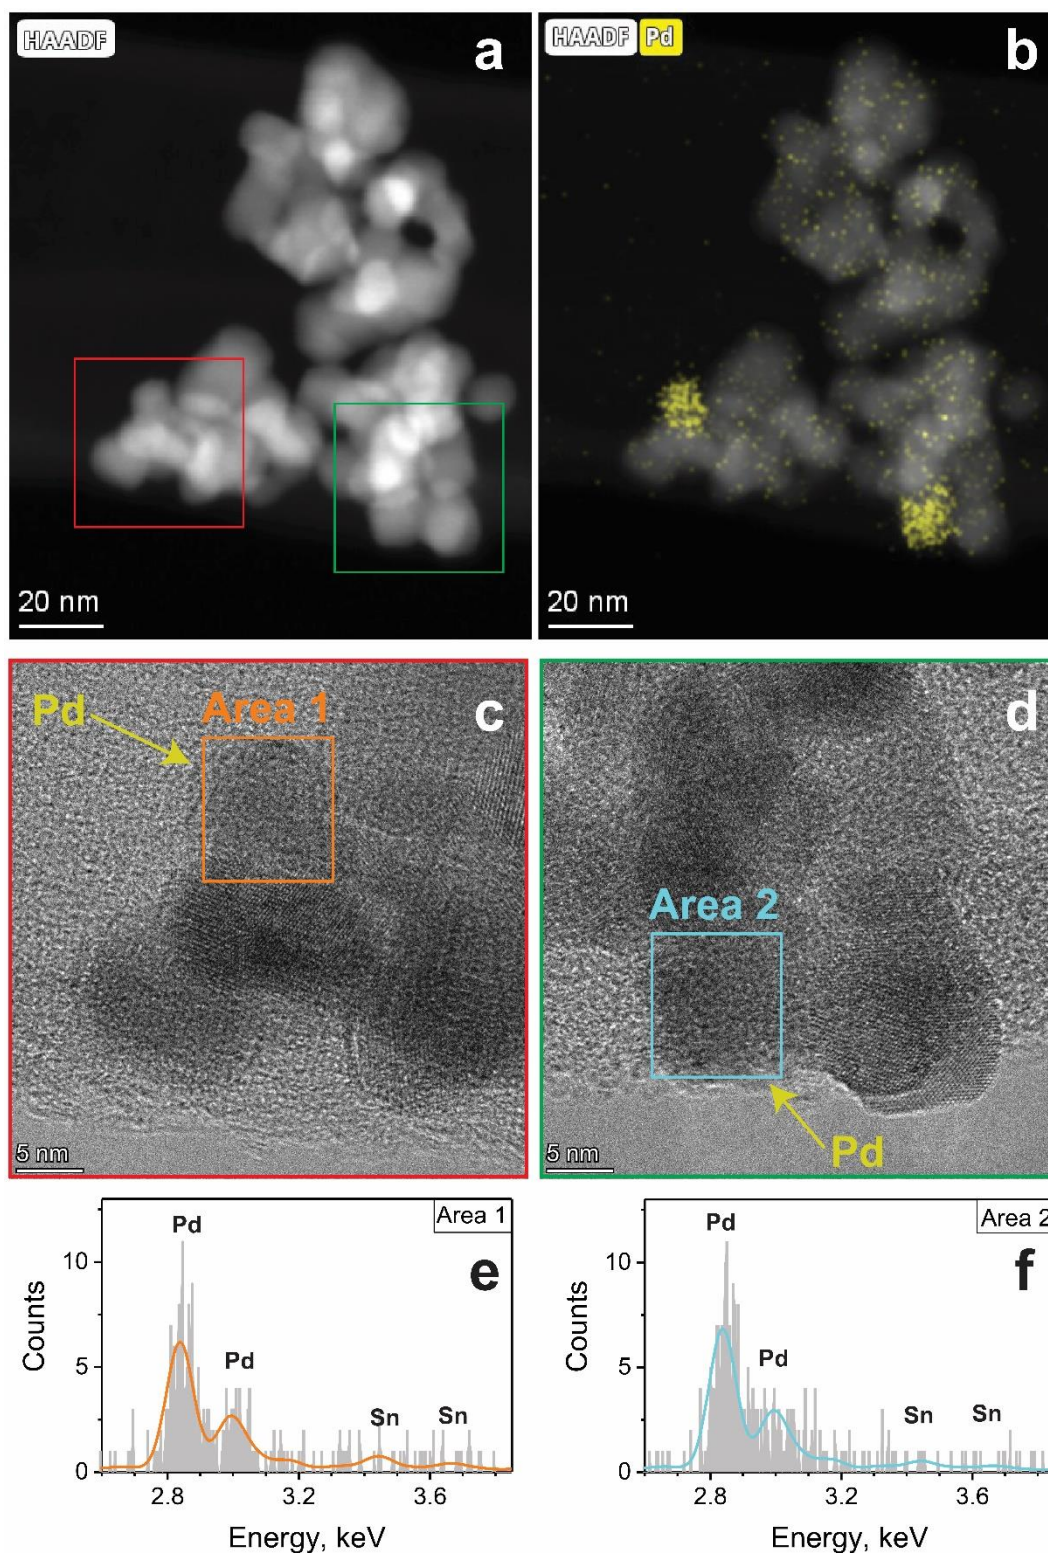

**Figure S4:** **a)** HAADF-STEM image of 3 mol% Pd-loaded SnO<sub>2</sub> (annealed) and **b)** combined with Pd elemental mapping. Two regions of interest have been identified with spots, where almost entirely Pd is present. These two regions have been further imaged with HR-TEM (**c** and **d**). No lattice fringes could be observed for the Pd-particles, while the neighboring SnO<sub>2</sub> particles clearly exhibited fringes, indicative of crystallinity. The EDX-spectra of the supposed PdO<sub>x</sub>-particles (**e** and **f**, based on regions highlighted in Figures c and d) confirm the presence of mostly Pd. Therefore, the PdO<sub>x</sub> particles are considered to be rather amorphous.



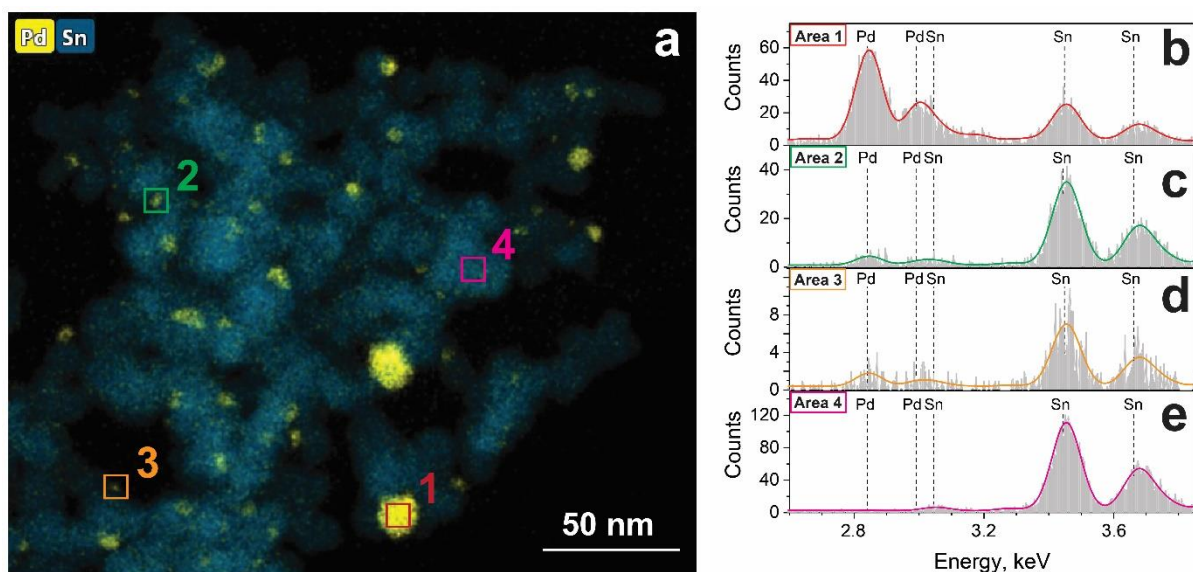

**Figure S5:** a) Elemental maps of Pd (yellow) and Sn (blue) of as-prepared 3 mol% Pd-loaded  $\text{SnO}_2$ . The EDX spectra of selected areas are depicted, specifically a large Pd cluster (Area 1, spectrum in b), a medium-sized cluster (Area 2, spectrum in c), a small Pd cluster (Area 3, spectrum in d), and a Pd-free  $\text{SnO}_2$  (Area 4, spectrum in e).

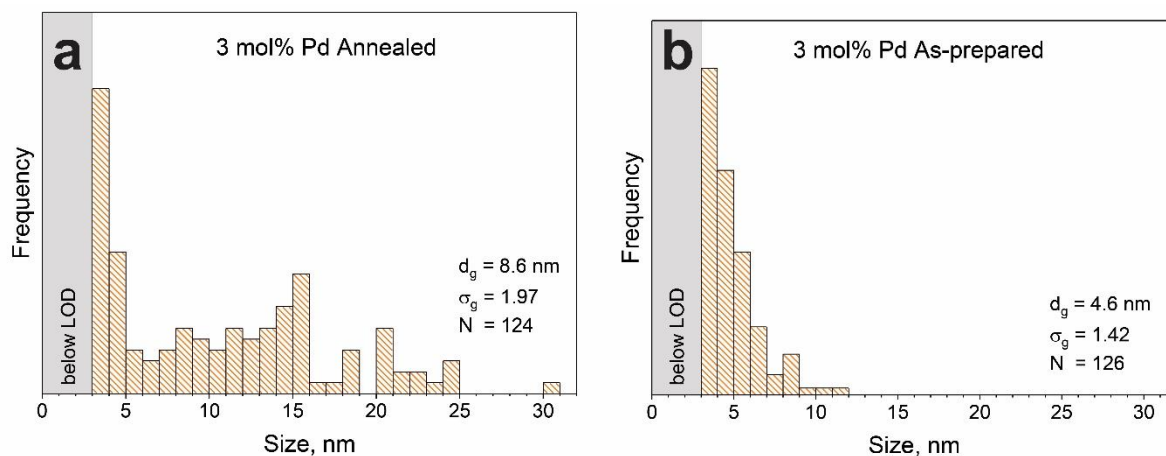

**Figure S6:** Area-equivalent Pd cluster size of 3 mol% Pd  $\text{SnO}_2$  a) after and b) before annealing. Only clusters with diameters above 3 nm were considered, following the observations in Figure 2. The inset gives the geometric mean ( $d_g$ ), geometric standard deviation ( $\sigma_g$ ) and number of counted particles (N).



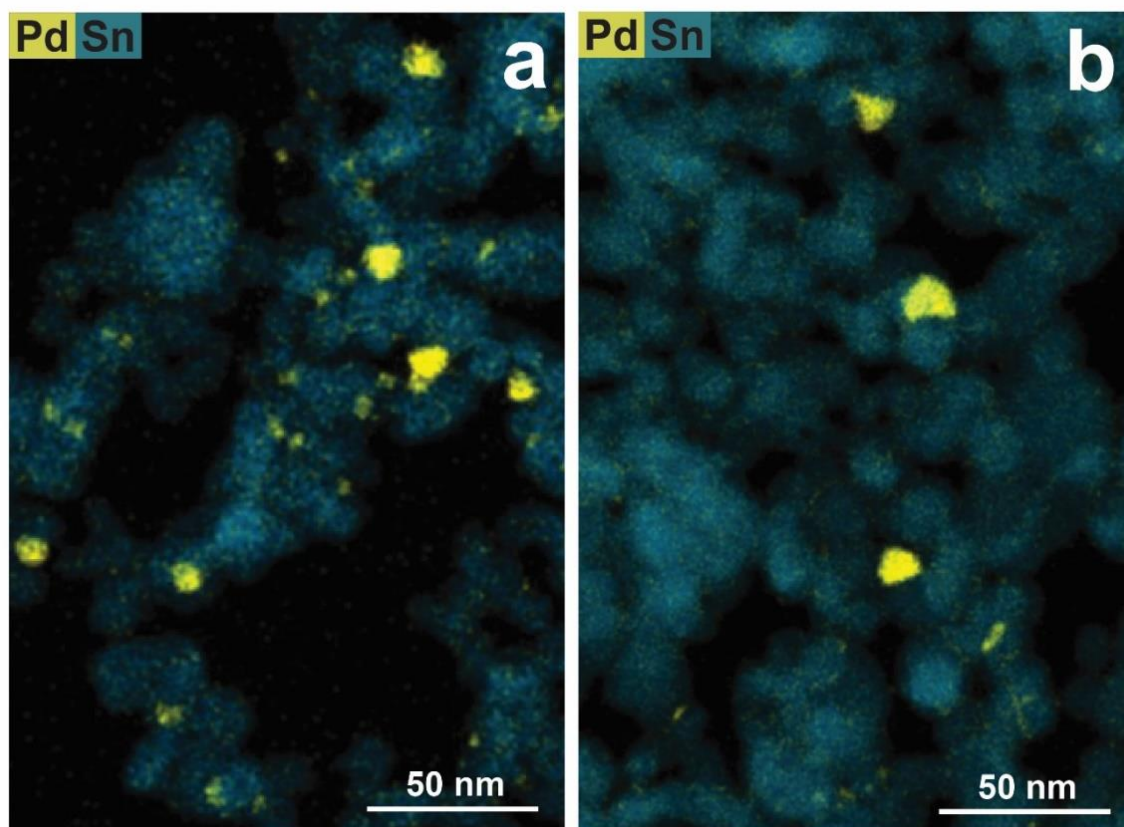

**Figure S7:** Additional microscopy images of 3 mol% Pd on SnO<sub>2</sub> with Pd and Sn elemental mappings of **a)** as-prepared and **b)** annealed after photodeposition. The as-prepared samples (a) show more Pd clusters, especially small ones (< 5 nm) that grow to larger ones (b).

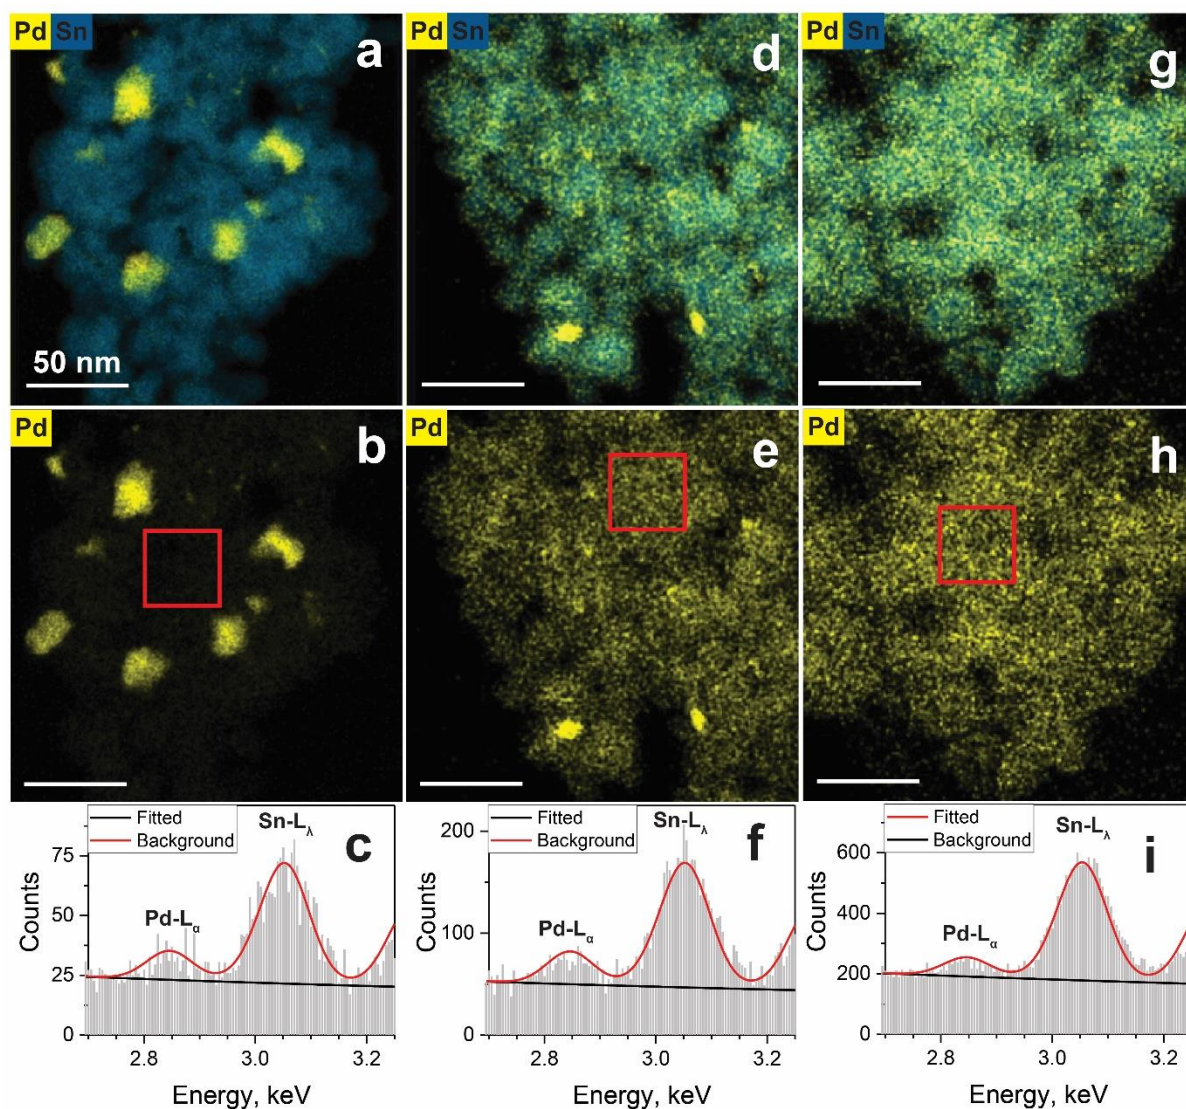

**Figure S8:** Elemental maps of annealed SnO<sub>2</sub> particles with **a-b)** 3 mol% Pd, **d-e)** 1 mol% Pd and **g-h)** 0.5 mol% Pd showing the overlay of Pd and Sn (**a,d,g**) or only Pd (**b,e,h**). All scale bars are 50 nm. For 3 mol% Pd, Pd particles from tens of nm down to a few nm can be observed. At 1 mol% Pd, Pd-particles with sizes between 15 and a few nm can be observed. At 0.5 mol%, barely any Pd-spots can be distinguished, indicating either very homogeneous distribution or spot sizes below 2 nm. Note that the color scale is adjusted for each image separately as the software of the microscope automatically adjusts the brightness to the brightest spot within the image. To allow a better comparison of the Pd loading in areas with weaker Pd signal (boxes in **b,e,h**), EDX spectra are shown in **c,f, and i**, revealing a very similar ratio between Pd and Sn, regardless of Pd loading.

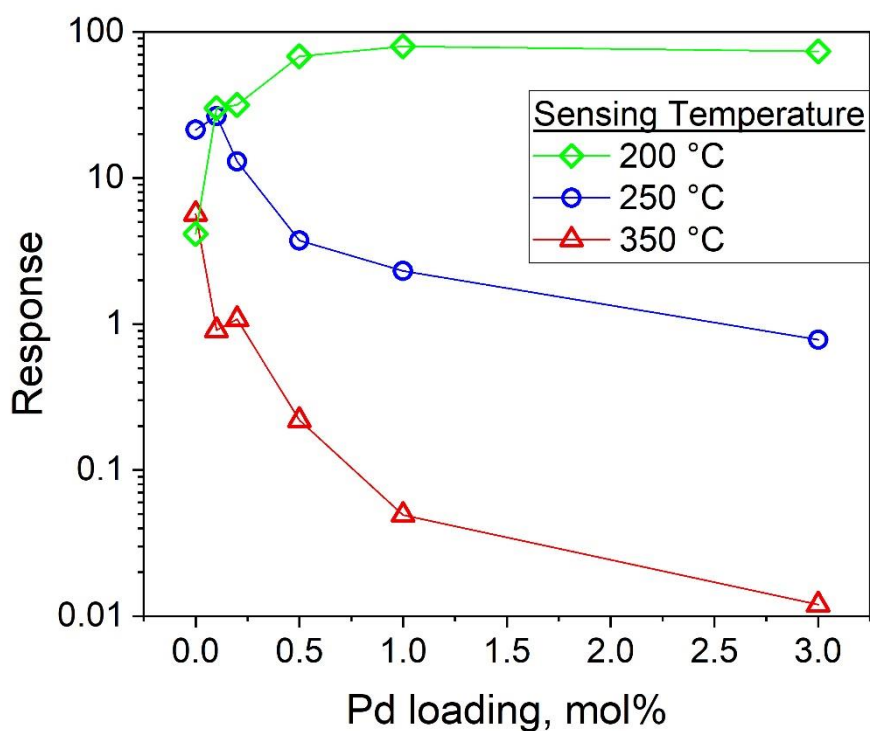

**Figure S9:** Responses to 1 ppm acetone (50 % RH) at different temperatures. Depending on the operating temperature, any Pd deteriorates sensing performance at 350 °C (red triangles). Only a tiny fraction of Pd improves sensing at 250 °C (blue circles), or any Pd loading improves sensing at 200 °C (green diamonds).

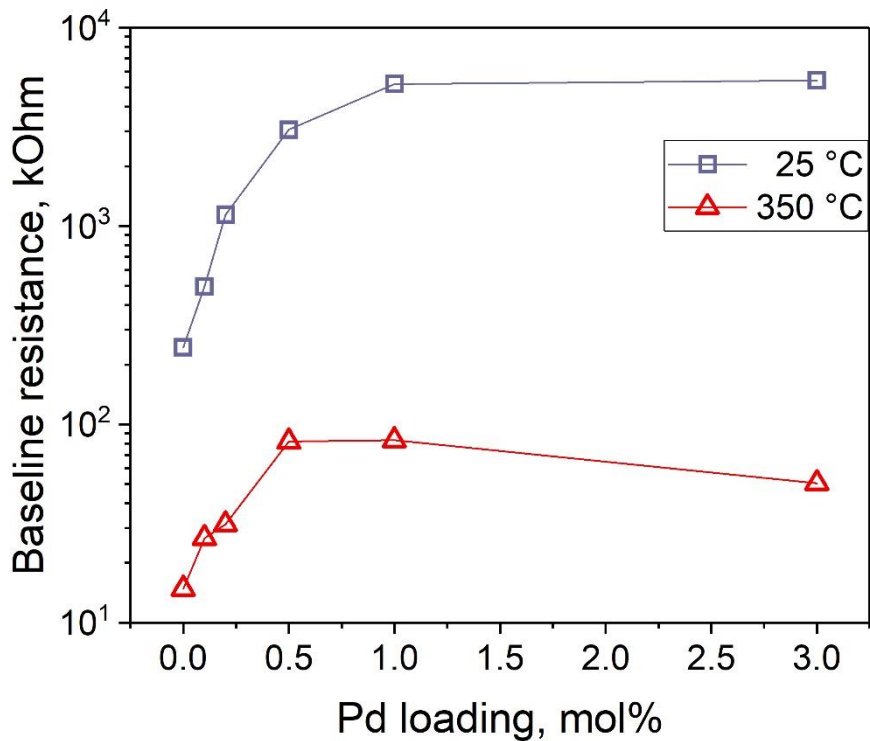

**Figure S10:** Baseline resistance (50 % relative humidity) at room temperature (purple squares) and 350 °C (red triangles). The increase of the resistance with Pd loading and saturation indicates the electrical sensitization effect of  $\text{PdO}_x$  on  $\text{SnO}_2$  [25].

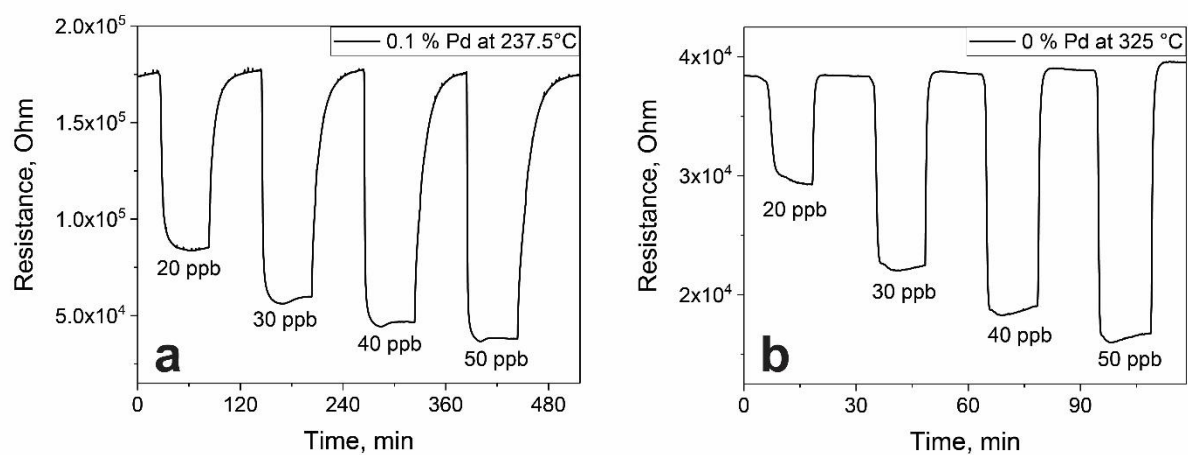

**Figure S11:** Film resistance in response to low concentration acetone pulses (20 – 50 ppb) of **a)** 0.1% Pd-SnO<sub>2</sub> operated at 237.5 °C and **b)** 0% Pd-SnO<sub>2</sub> operated at 325 °C and 50 % RH.

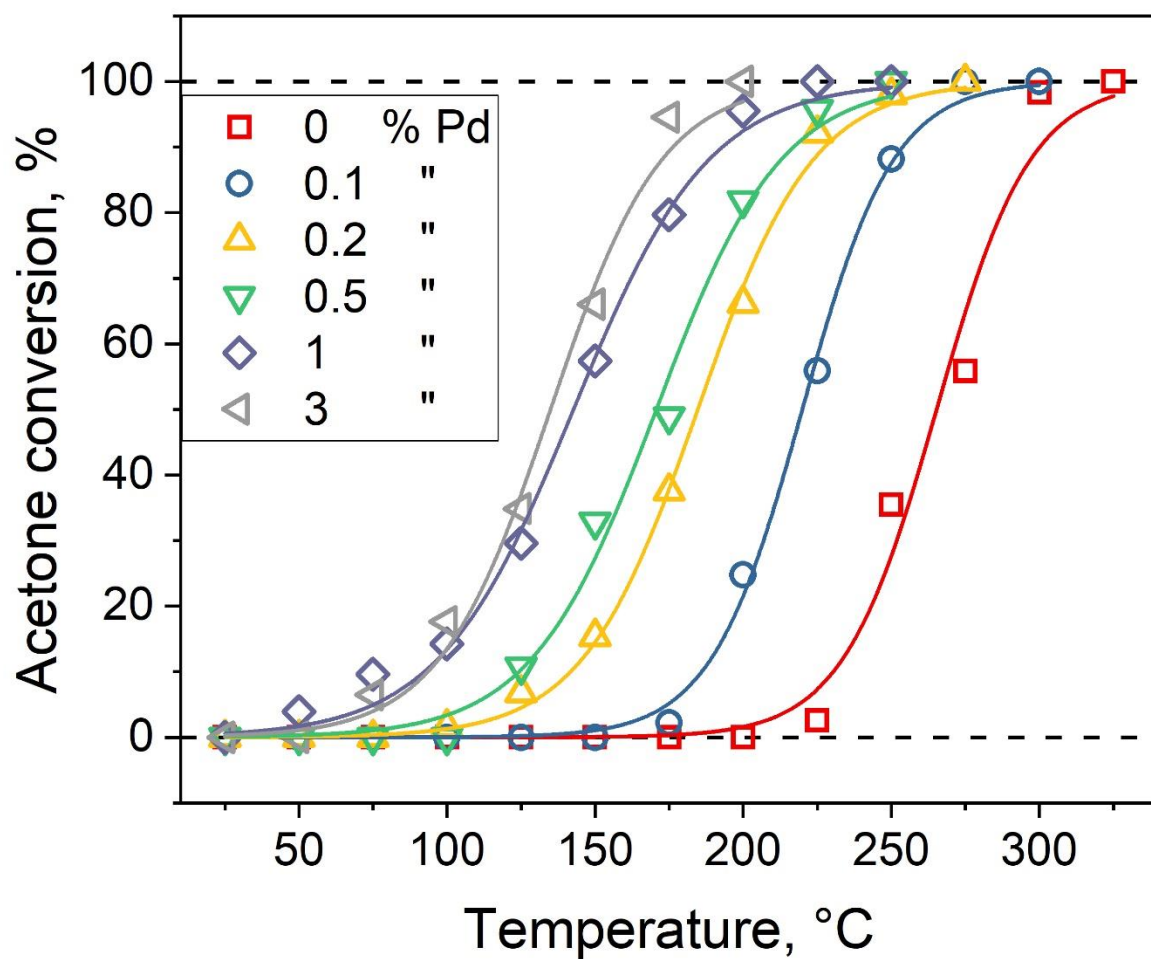

**Figure S12:** Acetone conversion fitting (solid lines) following Cabot et al. [9].

**Table S1:** Comparison of reported acetone sensors not based on Pd-SnO<sub>2</sub> with their key performance indicators

| Material                                    | Operating Temp. [°C] | Relative Humidity [%] | Response <sup>a</sup> (conc. In ppm) | Equiv. response at 1 ppm <sup>b</sup> | LOD [ppm]               | Response time <sup>c</sup> [s] | Recovery time <sup>c</sup> [s] | Reference                |
|---------------------------------------------|----------------------|-----------------------|--------------------------------------|---------------------------------------|-------------------------|--------------------------------|--------------------------------|--------------------------|
| Si-doped WO <sub>3</sub>                    | 400                  | 90                    | 1.48 (0.6)<br>Fig. 5a                | 2.47                                  | 0.02*<br>Fig. 7         | 77 (0.1 ppm)<br>Fig. 5b        | 83 (0.6 ppm)<br>Fig. 5b        | Righettoni, et al., 2010 |
| ZnO/ZnCo <sub>2</sub> O <sub>4</sub>        | 275<br>Fig. 7a       | No R.H.               | 1.5 (10)<br>Fig. 8b                  | 0.15                                  | 10*<br>Fig. 8b          | 15 (10 ppm)<br>Fig. 8b         | 38 (10 ppm)<br>Fig. 8b         | Zhou, et al., 2014       |
| Fe <sub>2</sub> O <sub>3</sub>              | 350<br>Fig. 4a       | No R.H.               | 10.5 (1)<br>Fig. 4c                  | 10.5                                  | 0.5*<br>0.0017†<br>text | 3 (50 ppm)<br>Fig. 4b          | 120 (50 ppm)<br>Fig. 4b        | Kim, et al., 2014        |
| ZnFe <sub>2</sub> O <sub>4</sub>            | 200                  | No R.H.               | 0.4 (1)                              | 0.4                                   | 1*                      | 15 (20 ppm)                    | 407 (20 ppm)                   | Zhou, et al., 2015       |
|                                             | Fig. 5a              |                       | Fig. 6a, inset                       |                                       | Fig. 6a, inset          | Fig. 5b                        | Fig. 5b                        |                          |
| Au-modified In <sub>2</sub> O <sub>3</sub>  | 340                  | 22                    | 16 (1)                               | 16                                    | 0.02*<br>0.015†         | 13                             | 16                             | Xing, et al., 2015       |
|                                             | Fig. 5a              |                       | Fig. 7                               |                                       | Fig. 7                  | Fig. 6d                        | Fig. 6d                        |                          |
| Pt-doped SnO <sub>2</sub>                   | 400                  | 90                    | 5 (1.2)                              | 4.2                                   | 0.25*                   | n.a.                           | n.a.                           | Güntner, et al., 2016    |
|                                             | Fig. 3a              |                       | Fig. 6a                              |                                       | Fig. 6a                 |                                |                                |                          |
| Pt-decorated In <sub>2</sub> O <sub>3</sub> | 200                  | No R.H.               | 10.4 (1.56)                          | 6.7                                   | 0.05*<br>0.01†          | 16 (1.56 ppm)                  | 67 (1.56 ppm)                  | Karmaoui, et al., 2016   |
|                                             | Fig. 7               |                       | Fig. 7                               |                                       | Fig. 8, inset           | Fig. 6                         | Fig. 6                         |                          |
| Rh-functionalized WO <sub>3</sub>           | 350                  | 95                    | 11 (1)                               | 11                                    | 1*<br>0.1†              | 20                             | 92                             | Kim, et al., 2016        |
|                                             | Fig. 6a              |                       | Fig. 6b                              |                                       | Fig. 6c                 | Fig. 7b                        | Fig. 7b                        |                          |
| Pt-PS-SnO <sub>2</sub> NT                   | 350                  | 90                    | 33.2 (1)                             | 33.2                                  | 0.01*<br>0.01†          | 11 (5 ppm)                     | 310 (5 ppm)                    | Jang, et al., 2016       |
|                                             | Fig. 5d              |                       | Fig. 5a                              |                                       | Fig. 5b                 | Fig. 5e                        | Fig. 5e                        |                          |
| Porous WO <sub>3</sub> NF                   | 270                  | 30 (55,75,95)         | 3.1 (1)                              | 3.1                                   | 0.1*                    | 12                             | 13                             | Wei, et al., 2016        |
|                                             | Fig. 8a              |                       | Fig. 8c                              |                                       | Fig. 5c                 | Fig. 5c                        | Fig. 5c                        |                          |
| Yb-ferrites                                 | 230                  | 33                    | 2.04 (1)                             | 2.04                                  | 0.05*                   | 29 (0.5 ppm)                   | 55 (0.5 ppm)                   | Zhang, et al., 2017b     |
|                                             | Fig. 18              |                       | Fig. 18                              |                                       | Fig. 18                 | Fig. 14b                       | Fig. 14b                       |                          |
| ZnO-Fe <sub>3</sub> O <sub>4</sub>          | 485                  | 20                    | 1.33 (1)                             | 1.33                                  | 0.15*                   | 16                             | 19                             |                          |



|                                                                  |                |                      |                       |      |                            |                           |                         |                         |
|------------------------------------------------------------------|----------------|----------------------|-----------------------|------|----------------------------|---------------------------|-------------------------|-------------------------|
|                                                                  | Fig. 6         |                      | Fig. 8c               |      | Fig. 8c                    | Fig. 7d                   | Fig. 7d                 | Zhang, et al., 2017a    |
| PdO-Co <sub>3</sub> O <sub>4</sub><br>HNC                        | 350            | 90                   | 0.55 (1)<br>Fig. 4a   | 0.55 | 0.4*<br>0.1†<br>Fig. 4a    | 194 (5 ppm)<br>Fig. 4d    | 350 (5 ppm)<br>Fig. 4d  | Koo, et al., 2017       |
| Pt-ZnO NFs                                                       | 450            | 95                   | 3.5 (1)<br>Fig. 5c    | 3.5  | 1*<br>0.029†<br>Fig. 5c    | 20<br>Fig. 6b             | 45<br>Fig. 6a           | Cho, et al., 2017       |
| PtRh-WO <sub>3</sub> NF                                          | 350            | 90                   | 103 (1)<br>Fig. 2f    | 103  | 0.1*<br>0.0003†<br>Fig. 2e | 4s<br>Fig. 3f             | 176<br>Fig. 3f          | Kim, et al., 2017       |
| Pt-Fe <sub>2</sub> O <sub>3</sub>                                | 220<br>Fig. 6a | 30                   | 0.8 (1)<br>Fig. 7c    | 0.8  | 0.8*<br>Fig. 7c            | 1 (100 ppm)<br>Fig. 8a    | 46 (100 ppm)<br>Fig. 8a | Liu, et al., 2017       |
| PtO <sub>2</sub> -loaded<br>SnO <sub>2</sub>                     | 400            | 95                   | 21 (1)<br>Fig. 3c     | 21   | 0.4*<br>Fig. 3a            | 15<br>Fig. 3b             | n.a.                    | Jeong, et al., 2018     |
| Pt-decorated<br>CuFe <sub>2</sub> O <sub>4</sub>                 | 300<br>Fig. 5a | 50                   | 2.25 (5)<br>Fig. 5b   | 0.45 | 5*<br>Fig. 5b              | 15 (100 ppm)<br>Fig. 6    | 360 (100 ppm)<br>Fig. 6 | Zhao, et al., 2018      |
| La <sub>2</sub> O <sub>3</sub> -doped<br>SnO <sub>2</sub>        | 350<br>Fig. 9  | No R.H.              | 6 (1)<br>Fig. 10c     | 6    | 0.1*<br>0.08†<br>Fig. 10c  | 115<br>Fig. 10c           | 1068<br>Fig. 10b        | Tammanoon, et al., 2018 |
| WO <sub>3</sub> -SnO <sub>2</sub>                                | 360<br>Fig. 3a | No R.H.              | 11.1 (100)<br>Fig. 3b | 0.11 | 100<br>Fig. 3b             | 11.5 (600 ppm)<br>Fig. 3c | 7 (600 ppm)<br>Fig. 3c  | Zhu, et al., 2018       |
| CuFe <sub>2</sub> O <sub>4</sub> /Fe <sub>2</sub> O <sub>3</sub> | 275<br>Fig. 6a | 50                   | 0.8 (1)<br>Fig. 7b    | 0.8  | 0.1*<br>Fig. 7b            | 5<br>Fig. 8               | 60<br>Fig. 8            | Li, et al., 2018 [42]   |
| Fe-C-WO <sub>3</sub>                                             | 300<br>Fig. 8  | 50 (also 20, 70, 90) | 7 (1)<br>Fig. 9b      | 7    | 0.2*<br>Fig. 9a            | 19 (0.9 ppm)<br>Fig. 11   | 21 (0.9 ppm)<br>Fig. 11 | Shen, et al., 2018      |
| Pt@HP WO <sub>3</sub><br>NFs                                     | 350<br>Fig. 5a | 55 (also 20, 90)     | 11.2 (1)<br>Fig. 5b   | 11.2 | 0.4*<br>Fig. 5c            | 150<br>Fig. 5c            | 60<br>Fig. 5c           | Kim, et al., 2018       |
| WO <sub>3</sub> /Pt-rGO                                          | 230<br>Fig. 5  | 60 (also 0, 95)      | 1.1 (1)<br>Fig. 7a    | 1.1  | 1*<br>0.6†<br>Fig. 7a      | 14.1 (10 ppm)<br>Fig. 6   | 16.8 (10 ppm)<br>Fig. 6 | Chen, et al., 2018      |

|                                                                                |         |                  |                 |      |                                |               |               |                     |
|--------------------------------------------------------------------------------|---------|------------------|-----------------|------|--------------------------------|---------------|---------------|---------------------|
| Co <sub>3</sub> O <sub>4</sub> core-shell                                      | 190     | No R.H.          | 1.3 (10)        | 0.13 | 10*                            | 4 (200 ppm)   | 8 (200 ppm)   | Zhang, et al., 2018 |
|                                                                                | Fig. 4a |                  | Fig. 4f, inset  |      | Fig. 4f, inset                 | Fig. 4c       | Fig. 4c       |                     |
| Al-doped ZnO                                                                   | 450     | 90               | 12.5 (1)        | 12.5 | 0.1*                           | 3 (10 ppm)    | 300 (10 ppm)  | Yoo, et al., 2019   |
|                                                                                | Fig. 3d |                  | Fig. 4c         |      | Fig. 4a                        | Fig. 3d       | Fig. 3d       |                     |
| Au-containing ZnO                                                              | 325     | 45               | 0.85 (1)        | 0.85 | 0.2                            | 6 (100 ppm)   | 3 (100 ppm)   | Xu, et al., 2019    |
|                                                                                | Fig. 3a |                  | Fig. 3b, inset  |      | Fig. 3b                        | Fig. 3d       | Fig. 3d       |                     |
| W <sub>18</sub> O <sub>49</sub> /Ti <sub>3</sub> C <sub>2</sub> T <sub>x</sub> | 300     | 10-98            | 1.5 (1)         | 1.5  | 0.17*                          | 5.6 (20 ppm)  | 18.2 (20 ppm) | Sun, et al., 2020   |
|                                                                                | Fig. 5f |                  | Fig. 6a, inset  |      | Fig. 6a, inset                 | Fig. 5g       | Fig. 5g       |                     |
| ZnCo <sub>2</sub> O <sub>4</sub> @Ag                                           | 220     | No R.H.          | 1.7 (1)         | 1.7  | 0.25*                          | 6             | 25            | Zhang, et al., 2020 |
|                                                                                | Fig. 5a |                  | Fig. 5b, inset  |      | Fig. 5b, inset                 | Fig. 6d       | Fig. 6d       |                     |
| Bi <sub>1-x</sub> La <sub>x</sub> FeO <sub>3</sub>                             | 260     | 90 (also 55, 70) | 17 (1)          | 17   | 0.05*                          | 15 (0.05 ppm) | 13 (0.05 ppm) | Peng, et al., 2020  |
|                                                                                | Fig. 3c |                  | Fig. 4c         |      | Fig. 4a                        | Fig. 4e       | Fig. 4e       |                     |
| Au@ZnO NS                                                                      | 170     | no               | 4.7 (1)         | 4.7  | 0.5*                           | 27 (100 ppm)  | 18 (100 ppm)  | Cao, et al., 2020   |
|                                                                                | Fig. 9a |                  | Fig. 10b, inset |      | Fig. 10b, inset                | Fig. 10c      | Fig. 10c      |                     |
| SnO <sub>2</sub>                                                               | 325     | 50               | 5.8 (1)         | 5.8  | 0.020*<br>0.00005 <sup>†</sup> | 24            | 104           | This work           |
| 0.1 mol% Pd-loaded SnO <sub>2</sub>                                            | 237.5   | 50               | 43.2 (1)        | 43.2 | 0.020*<br>0.00005 <sup>†</sup> | 26            | 1361          | This work           |

a: Responses were converted to the definition used in this manuscript

b: If not available, response was linearly extrapolated

c: Concentration was 1 ppm if not stated otherwise

†: LOD calculated/estimated

\*: lowest measured concentration



**Table S2.** Comparison of reported Pd-SnO<sub>2</sub> sensors for acetone detection with their key performance indicators. The precise origin of the literature is also given.

| Material                                                                   | Operating Temp. [°C] | Relative Humidity [%]  | Response <sup>a</sup> (Conc. in ppm) | Equiv. Response at 1 ppm <sup>b</sup> | LOD [ppm]            | Response Time <sup>c</sup> [s] | Recovery Time <sup>c</sup> [s] | Reference                  |
|----------------------------------------------------------------------------|----------------------|------------------------|--------------------------------------|---------------------------------------|----------------------|--------------------------------|--------------------------------|----------------------------|
| Pd-SnO <sub>2</sub>                                                        | 300                  | Yes, but not specified | 78 (25)                              | 23.5                                  | 25 *<br>1 †          | n.a.                           | n.a.                           | Epifani et al. (2008) [45] |
|                                                                            | Fig. 8               |                        | Fig. 9                               |                                       | Fig. 9               |                                |                                |                            |
| Pd-loaded flower-like SnO <sub>2</sub>                                     | 250                  | No R.H.                | 10 (10)                              | 1                                     | 10 *                 | 11 (10 ppm)                    | 30 (10 ppm)                    | Tian et al. (2014) [46]    |
|                                                                            | Fig. 9               |                        | Fig. 11                              |                                       | Fig. 11              | Fig. 12                        | Fig. 12                        |                            |
| Pd-SnO <sub>2</sub> organized                                              | RT                   | No R.H.                | 1.8 (10)                             | 0.18                                  | 10 *                 | 13                             | 15                             | Shao et al. (2015) [34]    |
|                                                                            |                      |                        | Fig. 7c                              |                                       | Fig. 7c              | Fig. 7b                        | Fig. 7b                        |                            |
| Pd-SnO <sub>2</sub> nanofibers                                             | 275                  | No R.H.                | 3 (1)                                | 3                                     | 1 *                  | 20                             | 40                             | Tang et al. (2015) [33]    |
|                                                                            | Fig. 9               |                        | Fig. 10                              |                                       | Fig. 10              | Fig. 11                        | Fig. 11                        |                            |
| Pd-loaded SnO <sub>2</sub> ultrathin nanorod-assembled hollow microspheres | 230                  | No R.H.                | 10.6 (20)                            | 0.5                                   | n.a.                 | n.a.                           | n.a.                           | Zhang et al. (2017) [47]   |
|                                                                            |                      |                        | Fig. 8                               |                                       |                      |                                |                                |                            |
| PdO@ZnO-SnO <sub>2</sub> NT                                                | 400                  | 95                     | 4.1 (1)                              | 4.1                                   | 0.1 *<br>0.01 †      | 19.6                           | 64                             | Koo et al. (2017) [48]     |
|                                                                            |                      |                        | Fig. 4b                              |                                       | Fig. 4a              | Fig. 4c                        | Fig. 4d                        |                            |
| PdAu-SnO <sub>2</sub> nanosheets                                           | 250                  | 40–70                  | 2.7 (1)                              | 2.7                                   | 0.1 *<br>0.045 †     | 5                              | 4                              | Li et al. (2019) [49]      |
|                                                                            | Fig. 6a              |                        | Fig. 8a                              |                                       | Fig. 8a              | Fig. 8b                        | Fig. 8b                        |                            |
| Pd-doped SnO <sub>2</sub>                                                  | 350                  | 50                     | 7 (1)                                | 7                                     | 0.005 *<br>0.0005 †  | 60 (50 ppb)                    | 138 (50 ppb)                   | Pineau et al. (2020) [18]  |
|                                                                            |                      |                        | Fig. 5a                              |                                       | Fig. 7               | Fig. 7                         | Fig. 8                         |                            |
| SnO <sub>2</sub>                                                           | 325                  | 50                     | 5.8 (1)                              | 5.8                                   | 0.020 *<br>0.00005 † | 24                             | 104                            | This work                  |
| 0.1% Pd-loaded SnO <sub>2</sub>                                            | 237.5                | 50                     | 43.2 (1)                             | 43.2                                  | 0.020 *<br>0.00005 † | 26                             | 1361                           | This work                  |

a: Responses were converted to the definition used in this manuscript. b: If not available, response was linearly extrapolated. c: Concentration was 1 ppm if not stated otherwise. †: LOD calculated/estimated. \*: Lowest measured concentration

### Activation Energy Determination (Khan, et al., 2021)

Flow rate of acetone ( $F_{Acetone}$ ):

$$F_{Acetone} \left[ \frac{mol}{s} \right] = \frac{\dot{V}_{total} \cdot c_{Acetone}}{V_{Acetone}^M}$$

wherein  $\dot{V}_{total}$ , equals the total gas flow over the catalyst bed,  $c_{Acetone}$  the acetone concentration and  $V_{Acetone}^M$  the molar volume of acetone, which is 24.46 L/mol, assuming ideal gas at 25 °C.

Reaction rate:

$$rate = \frac{F_{Acetone} \cdot X_{Acetone}}{m_{Pd}}$$

wherein  $X_{Acetone}$  equals the conversion of acetone, and  $m_{Pd}$ , the mass of Pd used.

Finally, the activation energy was calculated by taking the slope of an Arrhenius plot, represented by:

$$\ln(rate) = \frac{-E_A}{R} * \frac{1}{T}$$

wherein  $E_A$  is the activation energy (kJ/mol),  $R$  the ideal gas constant (J/(K\*mol)), and  $T$  the absolute temperature (K).

As the temperature resolution of our catalytic experiments yielded insufficient amount of data points in the typically employed range (2-10% conversion) for these calculations, the catalytic conversion curves were fitted according to Cabot et al. [9] by

$$Conversion(T) = \frac{N_c}{N_c + N_{nc}} = \frac{1}{1 + (N_{nc} / N_c)} \propto \frac{1}{1 + e^{-(T - T_{50\%})/\beta}}$$

where  $N_c$  and  $N_{nc}$  are the number of converted and non-converted acetone molecules, respectively. The  $T_{50\%}$  corresponds to the temperature of 50% of the catalytic conversion maximum, and  $\beta$  is the parameter giving the rate of variation of the catalytic conversion with temperature. The results of the fitting can be seen in Figure S12.

## References

- Cao, P. J.; Huang, Q. G.; Navale, S. T.; Fang, M.; Liu, X. K.; Zeng, Y. X.; Liu, W. J.; Stadler, F. J.; Lu, Y. M. *Appl. Surf. Sci.* **2020**, 518, 146223.
- Chen, L.; Huang, L.; Lin, Y.; Sai, L.; Chang, Q.; Shi, W.; Chen, Q. *Sens. Actuators B Chem.* **2018**, 255, 1482-1490.
- Cho, H.-J.; Kim, S.-J.; Choi, S.-J.; Jang, J.-S.; Kim, I.-D. *Sens. Actuators B Chem.* **2017**, 243, 166-175.
- Fagherazzi, G.; Canton, P.; Riello, P.; Pernicone, N.; Pinna, F.; Battagliarin, M. *Langmuir* **2000**, 16, (10), 4539-4546.
- Güntner, A. T.; Koren, V.; Chikkadi, K.; Righettoni, M.; Pratsinis, S. E. *ACS Sensors* **2016**, 1, (5), 528-535.
- Jang, J.-S.; Choi, S.-J.; Kim, S.-J.; Hakim, M.; Kim, I.-D. *Adv. Funct. Mater.* **2016**, 26, (26), 4740-4748.
- Jeong, Y. J.; Koo, W.-T.; Jang, J.-S.; Kim, D.-H.; Kim, M.-H.; Kim, I.-D. *ACS Appl Mater Inter* **2018**, 10, (2), 2016-2025.
- Karmaoui, M.; Leonardi, S. G.; Latino, M.; Tobaldi, D. M.; Donato, N.; Pullar, R. C.; Seabra, M. P.; Labrincha, J. A.; Neri, G. *Sens. Actuators B Chem.* **2016**, 230, 697-705.
- Khan, W. U.; Yu, I. K. M.; Sun, Y.; Polson, M. I. J.; Golovko, V.; Lam, F. L. Y.; Ogino, I.; Tsang, D. C. W.; Yip, A. C. K. *Environ. Pollut.* **2021**, 279, 116899.
- Kim, D.-H.; Jang, J.-S.; Koo, W.-T.; Choi, S.-J.; Kim, S.-J.; Kim, I.-D. *Sens. Actuators B Chem.* **2018**, 259, 616-625.
- Kim, D. H.; Shim, Y.-S.; Jeon, J.-M.; Jeong, H. Y.; Park, S. S.; Kim, Y.-W.; Kim, J.-S.; Lee, J.-H.; Jang, H. W. *ACS Appl Mater Inter* **2014**, 6, (17), 14779-14784.
- Kim, N.-H.; Choi, S.-J.; Kim, S.-J.; Cho, H.-J.; Jang, J.-S.; Koo, W.-T.; Kim, M.; Kim, I.-D. *Sens. Actuators B Chem.* **2016**, 224, 185-192.
- Kim, S.-J.; Choi, S.-J.; Jang, J.-S.; Cho, H.-J.; Koo, W.-T.; Tuller, H. L.; Kim, I.-D. *Adv. Mater.* **2017**, 29, (36), 1700737.
- Koo, W.-T.; Yu, S.; Choi, S.-J.; Jang, J.-S.; Cheong, J. Y.; Kim, I.-D. *ACS Appl. Mater. Interfaces* **2017**, 9, (9), 8201-8210.
- Liu, C.; Gao, H.; Wang, L.; Wang, T.; Yang, X.; Sun, P.; Gao, Y.; Liang, X.; Liu, F.; Song, H.; Lu, G. *Sens. Actuators B Chem.* **2017**, 252, 1153-1162.
- Müller, M.; Mikoviny, T.; Feil, S.; Haidacher, S.; Hanel, G.; Hartungen, E.; Jordan, A.; Märk, L.; Mutschlechner, P.; Schottkowsky, R.; Sulzer, P.; Crawford, J. H.; Wisthaler, A. *Atmos. Meas. Tech.* **2014**, 7, (11), 3763-3772.
- Peng, S.; Ma, M.; Yang, W.; Wang, Z.; Wang, Z.; Bi, J.; Wu, J. *Sens. Actuators B Chem.* **2020**, 313, 128060.
- Righettoni, M.; Tricoli, A.; Pratsinis, S. E. *Anal. Chem.* **2010**, 82, (9), 3581-3587.
- Shen, J.-Y.; Wang, M.-D.; Wang, Y.-F.; Hu, J.-Y.; Zhu, Y.; Zhang, Y. X.; Li, Z.-J.; Yao, H.-C. *Sens. Actuators B Chem.* **2018**, 256, 27-37.
- Sun, S.; Wang, M.; Chang, X.; Jiang, Y.; Zhang, D.; Wang, D.; Zhang, Y.; Lei, Y. *Sens. Actuators B Chem.* **2020**, 304, 127274.
- Tammanoon, N.; Wisitsoraat, A.; Phokharatkul, D.; Tuantranont, A.; Phanichphant, S.; Yordsri, V.; Liewhiran, C. *Sens. Actuators B Chem.* **2018**, 262, 245-262.
- Wei, S.; Zhao, G.; Du, W.; Tian, Q. *Vacuum* **2016**, 124, 32-39.
- Xing, R.; Li, Q.; Xia, L.; Song, J.; Xu, L.; Zhang, J.; Xie, Y.; Song, H. *Nanoscale* **2015**, 7, (30), 13051-13060.
- Xu, S.; Zhang, H.; Qi, L.; Xiao, L. *Microchim Acta* **2019**, 186, (6), 342.
- Yoo, R.; Güntner, A. T.; Park, Y.; Rim, H. J.; Lee, H.-S.; Lee, W. *Sens. Actuators B Chem.* **2019**, 283, 107-115.
- Zhang, D.; Jin, Y.; Chen, H.; Luo, Y.; Zhang, Y. *Ceram. Int.* **2020**, 46, (10), 15176-15182.
- Zhang, L.; Dong, B.; Xu, L.; Zhang, X.; Chen, J.; Sun, X.; Xu, H.; Zhang, T.; Bai, X.; Zhang, S.; Song, H. *Sens. Actuators B Chem.* **2017a**, 252, 367-374.
- Zhang, P.; Qin, H.; Lv, W.; Zhang, H.; Hu, J. *Sens. Actuators B Chem.* **2017b**, 246, 9-19.
- Zhang, R.; Zhou, T.; Wang, L.; Zhang, T. *ACS Appl Mater Inter* **2018**, 10, (11), 9765-9773.

Zhao, C.; Lan, W.; Gong, H.; Bai, J.; Ramachandran, R.; Liu, S.; Wang, F. *Ceram. Int.* **2018**, *44*, (3), 2856-2863.

Zhou, X.; Feng, W.; Wang, C.; Hu, X.; Li, X.; Sun, P.; Shimanoe, K.; Yamazoe, N.; Lu, G. *J. Mater. Chem. A* **2014**, *2*, (41), 17683-17690.

Zhou, X.; Li, X.; Sun, H.; Sun, P.; Liang, X.; Liu, F.; Hu, X.; Lu, G. *ACS Appl Mater Inter* **2015**, *7*, (28), 15414-15421.

Zhu, L.; Zeng, W.; Li, Y. *Mater. Lett.* **2018**, *231*, 5-7.
